# Supplementary material for: Voltammetric and impedimetric determinations of selenium(iv) by an innovative gold-free poly(1-aminoanthraquinone)/multiwall carbon nanotube-modified carbon paste electrode
Source: Royal Society of Chemistry journal article supplement (doi:10.1039/d1ra07588h), 2022-01-01
Supplement: d1ra07588h1.pdf [file d1ra07588h1.pdf]

1 **Voltammetric and Impedimetric Determinations of Selenium (IV) by An Innovative**  
2 **Gold-Free Poly(1-aminoanthraquinone)/Multiwall Carbon Nanotubes-Modified Carbon**  
3 **Paste Electrode**

4

5 Asmaa Galal Ali <sup>a\*</sup>, Mahmoud Fatehy Altahan <sup>b,1\*\*</sup>, Amr Mohamed Beltagi <sup>c</sup> Abla Ahmed  
6 Hathoot <sup>a</sup>, Magdi Abdel-Azzem <sup>a</sup>

7 <sup>a</sup> Electrochemistry Laboratory, Chemistry Department, Faculty of Science, Menoufia  
8 University, Shibin El-Kom 32511, Egypt

9 <sup>b</sup> Central Laboratory for Environmental Quality Monitoring, National Water Research Center,  
10 El-Qanater El- Khairia 13621, Egypt.

11 <sup>c</sup> Chemistry department, Faculty of Science, Kafrelsheikh University, Kafr El-Sheikh 33516,  
12 Egypt.

13

14 <sup>1</sup>Current address: GEOMAR, Helmholtz Center for Ocean Research, Kiel 24148, Germany,  
15 Email: [maltahan@geomar.de](mailto:maltahan@geomar.de).

16

17 Corresponding authors email: [asmaa.galal081986@gmail.com](mailto:asmaa.galal081986@gmail.com) (Asmaa Galal Ali)

18 [mahmoud\\_abdalqader@nwrc.gov.eg](mailto:mahmoud_abdalqader@nwrc.gov.eg) (Mahmoud Fatehy Altahan)

19

20

21

22

23 **Supplementary Information**

24

25

26

27

28

29

30

31

32

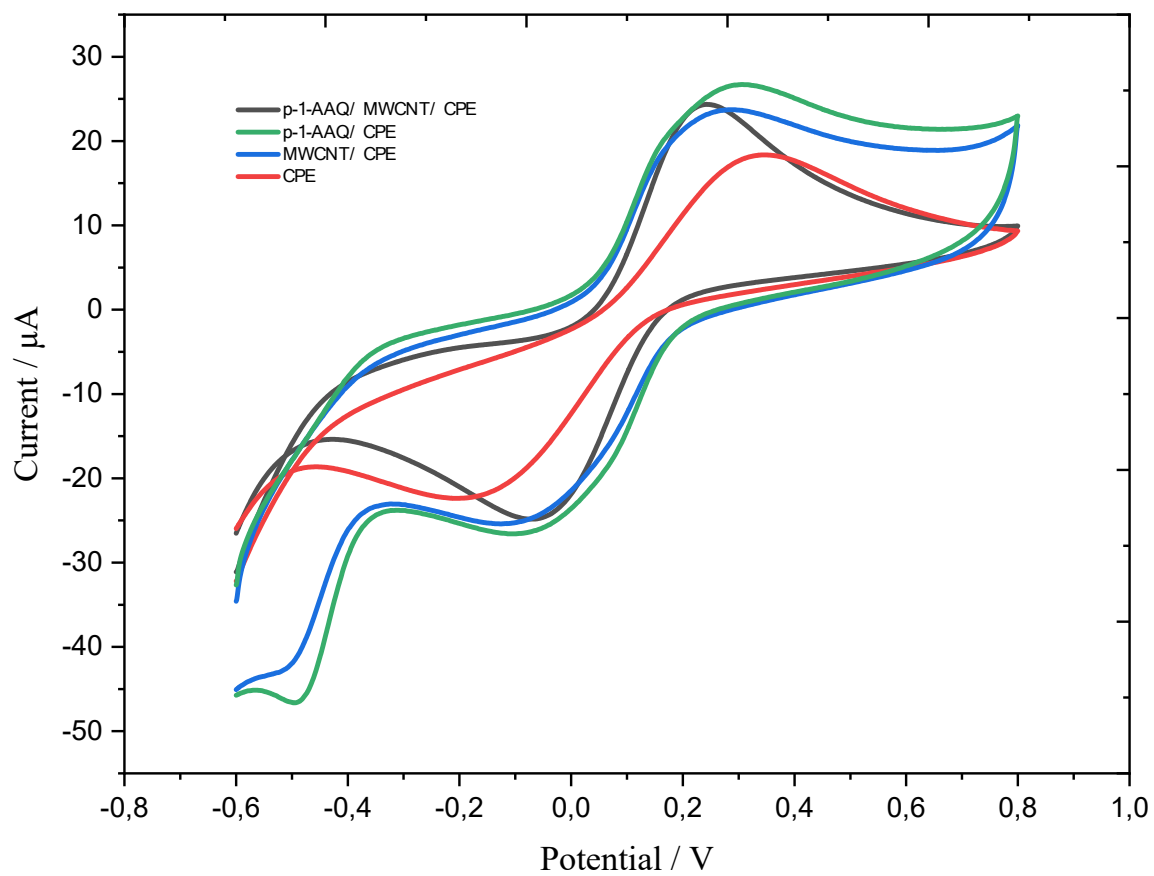

33

34 **Figure S1.** CVs of CPE, MWCNT/CPE, p-1-AAQ/CPE and p-1-AAQ/MWCNT/CPE into  
35 0.001 M  $[\text{Fe}(\text{CN})_6]^{3-/4-}$  containing 0.1 M KCl at scan rate 0.1 V.S<sup>-1</sup>.

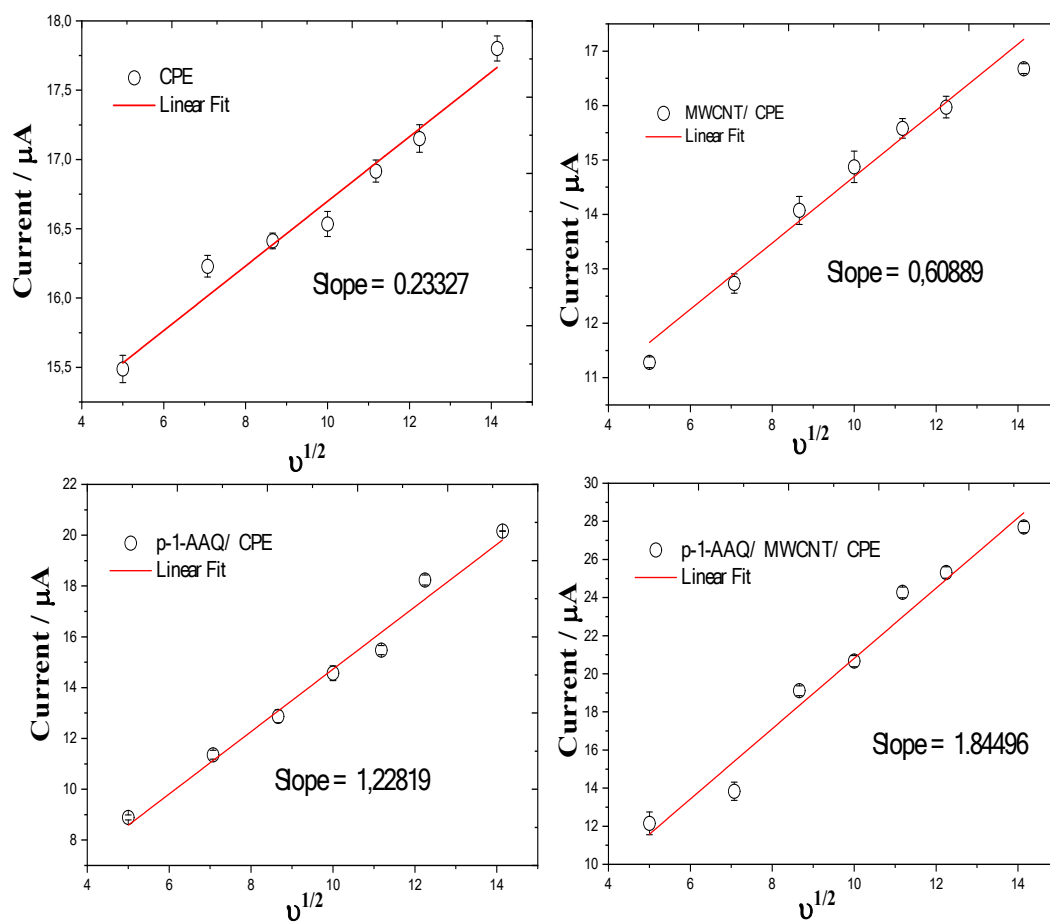

36  
37

38 **Figure S2.** Peaks current Vs. square root of Scan rates curves for CPE, MWCNT/CPE, p-1-  
39 AAQ/CPE and p-1-AAQ/MWCNT/CPE into 0.001 M  $[Fe(CN)_6]^{3-/4-}$  containing 0.1 M KCl at  
40 different scan rates (25 – 200  $mV.S^{-1}$ ).

41
